# Supplementary material for: Generation of clonal zebrafish line by androgenesis without egg irradiation
Source: PubMed Central journal article supplement (PMC4542340; doi:10.1038/srep13346), 2015-08-20
Supplement: srep13346-s1.pdf [file srep13346-s1.pdf]

## **Supplemental Information**

Title: Generation of clonal zebrafish line by androgenesis without egg irradiation

Jilun Hou<sup>a</sup>, Takafumi Fujimoto<sup>b, \*</sup>, Taiju Saito<sup>c</sup>, Etsuro Yamaha<sup>d</sup>, Katsutoshi Arai<sup>b</sup>

Supplemental Figure

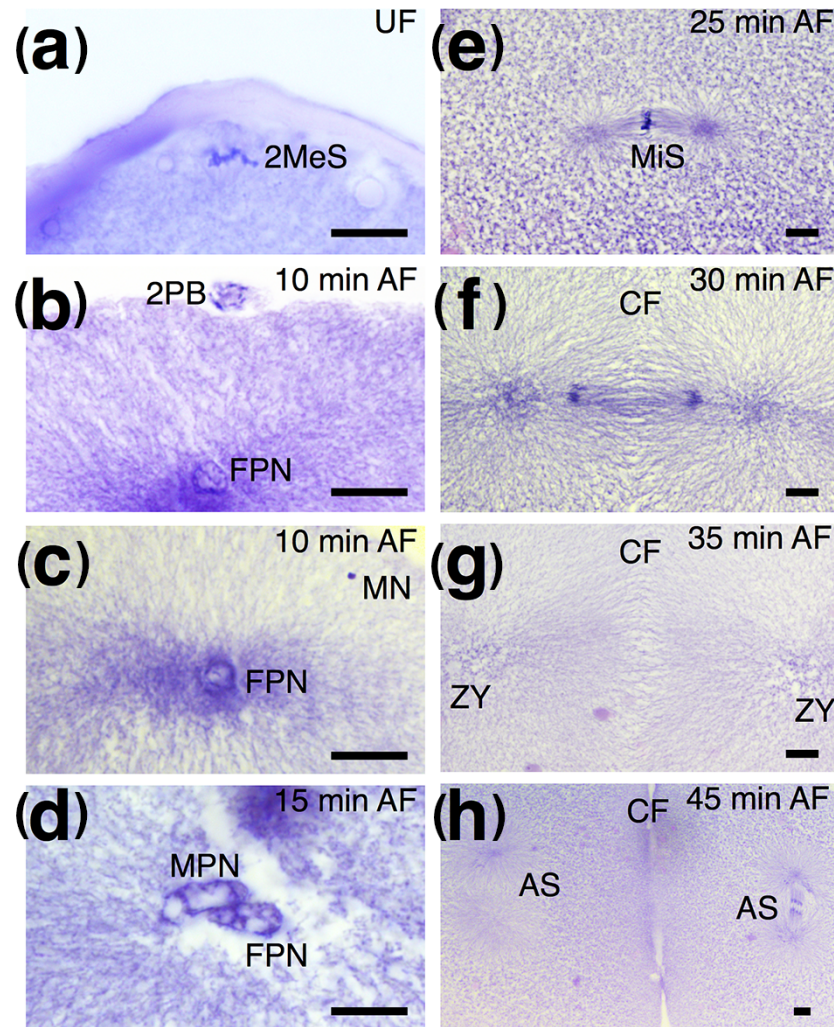

**Figure S1.** Histological sections of intact control eggs from zebrafish (*Danio rerio*). (a) Unfertilized eggs at metaphase of the second meiosis; (b) 10 min after fertilization (AF), second polar body was released, and the egg nucleus existed in the egg cytoplasm underneath the polar body; (c) 10 min AF, the condensed sperm nucleus and egg nucleus in the blastodisc; (d) 15 min AF, decondensed female and male pronuclei; (e) 25 min AF, metaphase of the first cleavage; (f) 30 min AF, anaphase of the first cleavage; (g) 35 min AF, prophase of the second cleavage; (h) 45 min AF, anaphase of the second cleavage. Scale bars denote 10 μm. Abbreviation: 2MeS, 2nd meiotic spindle; 2PB, 2nd polar body; FPN, female pronucleus; MN, male nucleus; MPN, male pronucleus; MiS, mitotic spindle; CF, cleavage furrow; ZY, zygote; AS, anaphase spindle.

## Supplemental Tables

**Table S1**

External appearance and ploidy status of progeny from groups subjected to different temperatures during cold-shock treatment (30 min) in zebrafish (*Danio rerio*).

| Treatment        | External appearance | Number of larvae | Ploidy status |    |    |                |                |
|------------------|---------------------|------------------|---------------|----|----|----------------|----------------|
|                  |                     |                  | 1N            | 2N | 3N | Hypo-2N        | Hyper-2N       |
| Intact control   | Normal              | 80               | 0             | 80 | 0  | 0              | 0              |
|                  | Abnormal            | 16               | 0             | 16 | 0  | 0              | 0              |
| 1°C, cold-shock  | Normal              | 2                | 0             | 0  | 2  | 0              | 0              |
|                  | Abnormal            | 3                | 1             | 0  | 0  | 0              | 2 <sup>a</sup> |
| 4°C, cold-shock  | Normal              | 0                | 0             | 0  | 0  | 0              | 0              |
|                  | Abnormal            | 14               | 7             | 0  | 1  | 3 <sup>b</sup> | 3 <sup>c</sup> |
| 7°C, cold-shock  | Normal              | 3                | 0             | 0  | 3  | 0              | 0              |
|                  | Abnormal            | 47               | 39            | 0  | 1  | 6 <sup>d</sup> | 1 <sup>e</sup> |
| 10°C, cold-shock | Normal              | 30               | 0             | 6  | 23 | 0              | 1 <sup>f</sup> |
|                  | Abnormal            | 44               | 8             | 8  | 17 | 7 <sup>g</sup> | 4 <sup>h</sup> |

<sup>a</sup> 2.3N and 2.8N

<sup>b</sup> 1.2N, 1.3N and 1.6N

<sup>c</sup> 2.4N, 2.5N and 3.4N

<sup>d</sup> 1.2N (3), 1.3N (2), and 1.5N

<sup>e</sup> 2.6N

<sup>f</sup> 2.6N

<sup>g</sup> 1.2N, 1.4N, 1.6N (3), and 1.7N (2)

<sup>h</sup> 2.2N (2), 2.6N, and 2.7N

**Table S2**

External appearance and ploidy status of progeny from groups subjected to different durations of cold-shock treatment (7°C) in zebrafish (*Danio rerio*).

| Treatment         | External appearance | Number of larvae | Ploidy status |     |    |                 |                |
|-------------------|---------------------|------------------|---------------|-----|----|-----------------|----------------|
|                   |                     |                  | 1N            | 2N  | 3N | Hypo-2N         | Hyper-2N       |
| Intact control    | Normal              | 104              | 0             | 104 | 0  | 0               | 0              |
| 20 min cold-shock | Abnormal            | 0                | 0             | 0   | 0  | 0               | 0              |
|                   | Normal              | 6                | 0             | 1   | 5  | 0               | 0              |
| 30 min cold-shock | Abnormal            | 61               | 34            | 12  | 1  | 10 <sup>a</sup> | 4 <sup>b</sup> |
|                   | Normal              | 7                | 0             | 0   | 7  | 0               | 0              |
| 40 min cold-shock | Abnormal            | 46               | 33            | 2   | 2  | 5 <sup>c</sup>  | 4 <sup>d</sup> |
|                   | Normal              | 6                | 0             | 0   | 6  | 0               | 0              |
| 50 min cold-shock | Abnormal            | 43               | 29            | 3   | 4  | 2 <sup>e</sup>  | 5 <sup>f</sup> |
|                   | Normal              | 4                | 0             | 0   | 4  | 0               | 0              |
| 60 min cold-shock | Abnormal            | 19               | 16            | 0   | 1  | 2 <sup>g</sup>  | 0              |
|                   | Normal              | 3                | 0             | 0   | 3  | 0               | 0              |
| 60 min cold-shock | Abnormal            | 21               | 16            | 0   | 2  | 0               | 3 <sup>h</sup> |

<sup>a</sup> 1.2N (4), 1.3N (2), 1.5N, 1.6N (2), and 1.7N

<sup>b</sup> 2.3N, 2.4N, 2.6N, and 2.8N

<sup>c</sup> 1.3N, 1.4N, 1.6N (2), and 1.8N

<sup>d</sup> 2.4N (3) and 6N

<sup>e</sup> 1.2N and 1.5N

<sup>f</sup> 2.3N, 2.6N (2), and 2.7N (2)

<sup>g</sup> 1.3N and 1.5N

<sup>h</sup> 2.2N and 2.4N (2)

**Table S3**

Microsatellite genotypes at four loci in haploid, diploid, and triploid progeny following cold-shock treatment (7°C, 30 min) in zebrafish (*Danio rerio*).

| Locus (LG) <sup>a</sup> | Female  | Male    | Progeny from cold shock treatment |                                                      |                                  |
|-------------------------|---------|---------|-----------------------------------|------------------------------------------------------|----------------------------------|
|                         |         |         | Haploid                           | Diploid                                              | Triploid                         |
| Z7576<br>(LG 12)        | 208/246 | 121/121 | 121: 10                           | 208/121: 3<br>247/121: 7                             | 208/246/121: 10                  |
| Z6010<br>(LG 17)        | 123/161 | 175/179 | 175: 7<br>179: 3                  | 123/175: 3<br>123/179: 3<br>161/175: 2<br>161/179: 2 | 123/161/175: 6<br>123/161/179: 4 |
| Z9708<br>(LG 20)        | 214/218 | 172/286 | 172: 5<br>286: 5                  | 214/172: 1<br>218/172: 1<br>214/286: 5<br>218/286: 3 | 214/218/172: 4<br>214/218/286: 6 |
| Z11786<br>(LG 25)       | 152/152 | 140/164 | 140: 7<br>164: 3                  | 152/140: 5<br>152/164: 5                             | 152/140: 4<br>152/164: 6         |

Abbreviation: LG, linkage group.

<sup>a</sup> See Shimoda *et al.*<sup>15</sup>.

**Table S4**

Microsatellite genotyping of putative androgenetic doubled haploids (DHs) with the golden phenotype in zebrafish (*Danio rerio*).

| Locus (LG) <sup>a</sup> | DH1 | DH2 | DH3 | DH4 | DH5 | DH6 | DH7 | DH8 |
|-------------------------|-----|-----|-----|-----|-----|-----|-----|-----|
| Z1781 (LG 1)            | 200 | 200 | 200 | 200 | 200 | 200 | 200 | 200 |
| Z8874 (LG 1)            | 150 | 150 | 150 | 150 | 150 | 150 | 150 | 150 |
| Z644 (LG 2)             | 230 | 230 | 230 | 230 | 230 | 230 | 230 | 230 |
| Z9408 (LG 3)            | 186 | 238 | 280 | 238 | 280 | 280 | 280 | 238 |
| Z7629 (LG 4)            | 238 | 186 | 188 | 188 | 186 | 282 | 188 | 188 |
| Z896 (LG 5)             | 228 | 205 | 205 | 228 | 228 | 228 | 205 | 228 |
| Z3314 (LG 5)            | 126 | 126 | 126 | 126 | 126 | 126 | 126 | 126 |
| Z740 (LG 6)             | 232 | 235 | 235 | 232 | 232 | 235 | 235 | 235 |
| Z1050 (LG 6)            | 138 | 138 | 144 | 144 | 144 | 138 | 138 | 144 |
| Z8495 (LG 7)            | 240 | 240 | 240 | 240 | 240 | 240 | 240 | 240 |
| Z1402 (LG 8)            | 206 | 206 | 206 | 206 | 206 | 206 | 206 | 206 |
| Z9637 (LG 8)            | 146 | 146 | 146 | 146 | 146 | 146 | 146 | 146 |
| Z106 (LG 9)             | 188 | 188 | 188 | 188 | 188 | 188 | 188 | 188 |
| Z1450 (LG 10)           | 238 | 238 | 258 | 238 | 238 | 238 | 238 | 238 |
| Z10215 (LG 11)          | 118 | 118 | 118 | 118 | 118 | 118 | 118 | 118 |
| Z7576 (LG 12)           | 121 | 378 | 376 | 121 | 378 | 378 | 206 | 206 |
| Z6622 (LG 13)           | 154 | 154 | 154 | 274 | 154 | 274 | 274 | 274 |
| Z1652 (LG 14)           | 140 | 98  | 98  | 98  | 140 | 140 | 98  | 140 |
| Z3309 (LG 15)           | 104 | 118 | 174 | 176 | 118 | 118 | 176 | 118 |
| Z992 (LG 16)            | 220 | 256 | 256 | 256 | 220 | 256 | 220 | 256 |
| Z3127 (LG17)            | 138 | 140 | 138 | 140 | 140 | 140 | 140 | 140 |
| Z1990 (LG17)            | 190 | 190 | 190 | 190 | 190 | 190 | 190 | 190 |
| Z1136 (LG 18)           | 116 | 116 | 116 | 116 | 184 | 116 | 116 | 116 |
| Z9331 (LG 19)           | 292 | 292 | 292 | 292 | 292 | 292 | 292 | 292 |
| Z9708 (LG 20)           | 218 | 218 | 218 | 218 | 218 | 218 | 218 | 218 |
| Z11113 (LG 21)          | 220 | 220 | 220 | 220 | 196 | 220 | 220 | 220 |
| Z6613 (LG 22)           | 184 | 118 | 184 | 184 | 184 | 184 | 184 | 184 |
| Z5265 (LG 23)           | 196 | 216 | 216 | 200 | 152 | 216 | 196 | 216 |
| Z7349 (LG 24)           | 204 | 212 | 212 | 212 | 212 | 212 | 212 | 212 |
| Z11786 (LG 25)          | 164 | 164 | 164 | 152 | 152 | 164 | 164 | 164 |

Abbreviation: LG, linkage group.

<sup>a</sup> See Shimoda *et al.*<sup>15</sup>.

**Table S5**

Summary of amplified fragment length polymorphism (AFLP) data.

|                | No. of fish | No. of primer sets | No. of bands | Frequency of polymorphisms (%) | BSI <sup>a</sup> |
|----------------|-------------|--------------------|--------------|--------------------------------|------------------|
| Clonal line    | 8           | 64                 | 34–94        | 0.00                           | 1                |
| Intact control | 8           | 31                 | 52–103       | 50.00–92.42                    | 0.76 ± 0.13      |

Abbreviation: BSI: band sharing index

<sup>a</sup>The data are shown as total means ± SDs for all primers. See Arai *et al.*<sup>32</sup>.

**Table S6**

Adaptors and primers used for amplified fragment length polymorphism (AFLP).

| Adaptor or primer                 | Sequences (5' → 3')         |
|-----------------------------------|-----------------------------|
| <i>Eco</i> RI adaptor-1           | CTCGTAGACTGCGTACC           |
| <i>Eco</i> RI adaptor-2           | AATTGGTACGCAGTCTAC          |
| <i>Mse</i> I adaptor-1            | GACGATGAGTCCTGAG            |
| <i>Mse</i> I adaptor-2            | TACTCAGGACTCAT              |
| <i>Eco</i> RI preselective primer | GACTGCGTACCAATT <u>CA</u>   |
| <i>Mse</i> I preselective primer  | GATGAGTCCTGAGTAA <u>C</u>   |
| Selective primer:                 |                             |
| E-AAC                             | GACTGCGTACCAATT <u>CAAC</u> |
| E-AAG                             | GACTGCGTACCAATT <u>CAAG</u> |
| E-ACA                             | GACTGCGTACCAATT <u>CACA</u> |
| E-ACC                             | GACTGCGTACCAATT <u>CACC</u> |
| E-ACG                             | GACTGCGTACCAATT <u>CACG</u> |
| E-ACT                             | GACTGCGTACCAATT <u>CACT</u> |
| E-AGC                             | GACTGCGTACCAATT <u>CAGC</u> |
| E-AGG                             | GACTGCGTACCAATT <u>CAGG</u> |
| M-CAA                             | GATGAGTCCTGAGTAA <u>CAA</u> |
| M-CAC                             | GATGAGTCCTGAGTAA <u>CAC</u> |
| M-CAG                             | GATGAGTCCTGAGTAA <u>CAG</u> |
| M-CAT                             | GATGAGTCCTGAGTAA <u>CAT</u> |
| M-CTA                             | GATGAGTCCTGAGTAA <u>CTA</u> |
| M-CTC                             | GATGAGTCCTGAGTAA <u>CTC</u> |
| M-CTG                             | GATGAGTCCTGAGTAA <u>CTG</u> |
| M-CTT                             | GATGAGTCCTGAGTAA <u>CTT</u> |



**Table S7**

Primer combinations for selective amplification using amplified fragment length polymorphism (AFLP)<sup>a</sup>.

|             | M1<br>M-CAA | M2<br>M-CAC | M3<br>M-CAG | M4<br>M-CAT | M5<br>M-CTA | M6<br>M-CTC | M7<br>M-CTG | M8<br>M-CTT |
|-------------|-------------|-------------|-------------|-------------|-------------|-------------|-------------|-------------|
| E1<br>E-AAC | E1/M1*      | E1/M2*      | E1/M3*      | E1/M4*      | E1/M5*      | E1/M6*      | E1/M7*      | E1/M8*      |
| E2<br>E-AAG | E2/M1*      | E2/M2*      | E2/M3*      | E2/M4*      | E2/M5*      | E2/M6*      | E2/M7*      | E2/M8*      |
| E3<br>E-ACA | E3/M1       | E3/M2       | E3/M3       | E3/M4       | E3/M5       | E3/M6       | E3/M7       | E3/M8       |
| E4<br>E-ACC | E4/M1       | E4/M2       | E4/M3       | E4/M4       | E4/M5       | E4/M6       | E4/M7       | E4/M8       |
| E5<br>E-ACG | E5/M1       | E5/M2       | E5/M3       | E5/M4       | E5/M5       | E5/M6       | E5/M7       | E5/M8       |
| E6<br>E-ACT | E6/M1       | E6/M2       | E6/M3       | E6/M4       | E6/M5       | E6/M6       | E6/M7       | E6/M8       |
| E7<br>E-AGC | E7/M1       | E7/M2*      | E7/M3*      | E7/M4*      | E7/M5*      | E7/M6*      | E7/M7*      | E7/M8*      |
| E8<br>E-AGG | E8/M1*      | E8/M2*      | E8/M3*      | E8/M4*      | E8/M5*      | E8/M6*      | E8/M7*      | E8/M8*      |

<sup>a</sup> For the clonal line, all of the combinations were used; for the intact control, the combinations with asterisk in the table were used.
